# Supplementary material for: Targeted Microchip Capillary Electrophoresis-Orbitrap Mass Spectrometry Metabolomics to Monitor Ovarian Cancer Progression
Source: MDPI journal article supplement (doi:10.3390/metabo12060532), 2022-06-09
Supplement: s1 [file s1]

## Supplementary Materials for

### Targeted Microchip Capillary Electrophoresis-Orbitrap Mass Spectrometry Metabolomics to Monitor Ovarian Cancer Progression.

Samyukta Sah, Sylvia R. Yun, David A. Gaul, Andro Botros, Eun Young Park, Olga Kim, Jaeyeon Kim, Facundo M. Fernández.

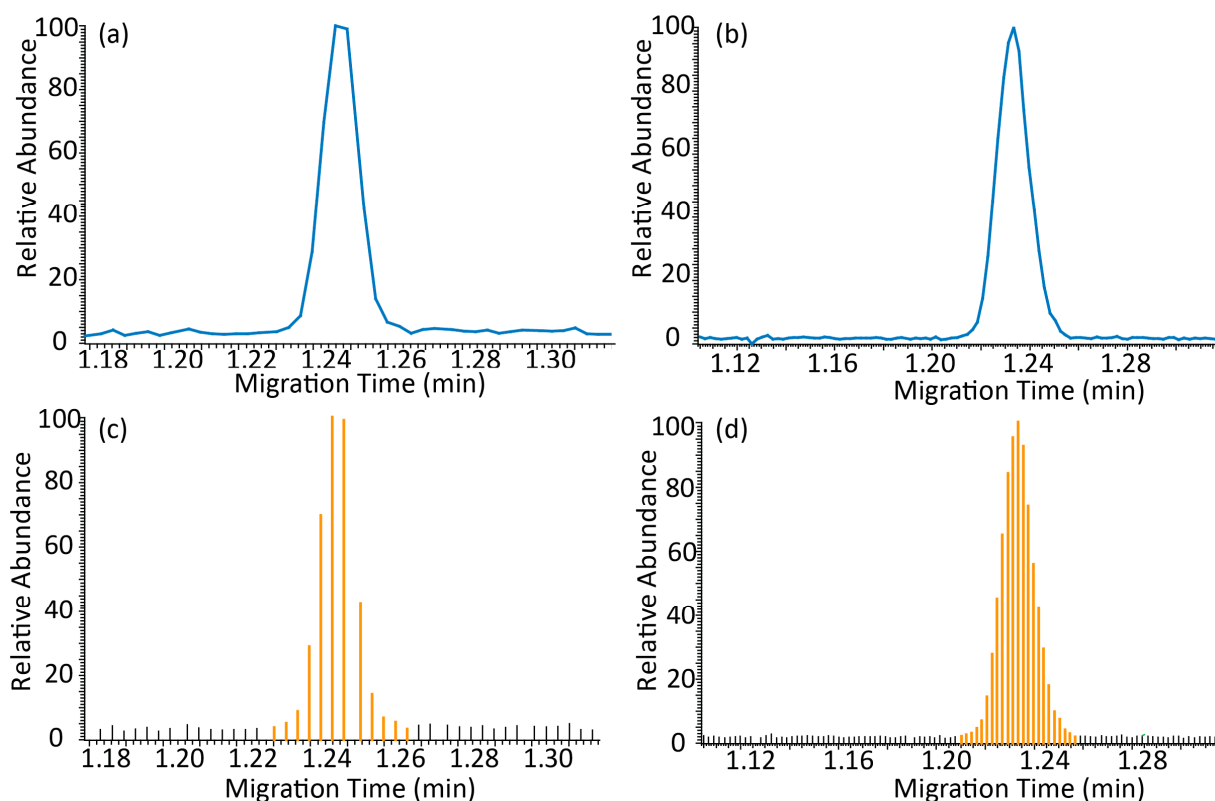

**Figure S1.** Comparison of  $\mu$ CE-HRMS peak shapes at different Orbitrap mass resolving power settings. Peak shape for alanine in a mixture of 20 analytes at (a) 35,000 resolving power (b) 17,500 resolving power. Individual MS scans acquired for alanine at (c) 35,000 resolving power (12 scans) and (d) 17,500 resolving power (24 scans).

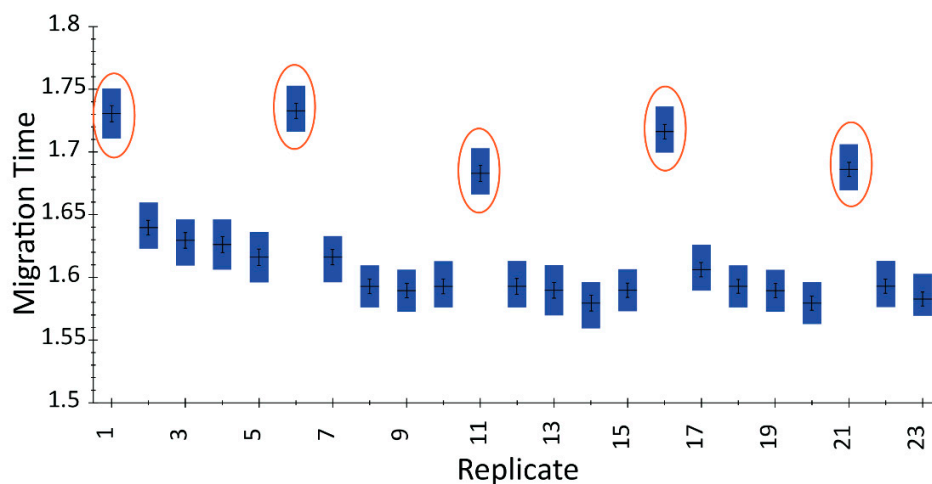

**Figure S2.** Analysis of migration time variation for metabolite analytes in TKO mouse serum. Migration time for  $^{13}\text{C}$  phenylalanine across 23 replicates. The x-axis shows the replicate number and the y-axis represents the migration time window for the corresponding replicate. Replicates circled in orange represent the sample runs after background electrolyte (BGE) refreshes. Each replicate run lasted 3 min.

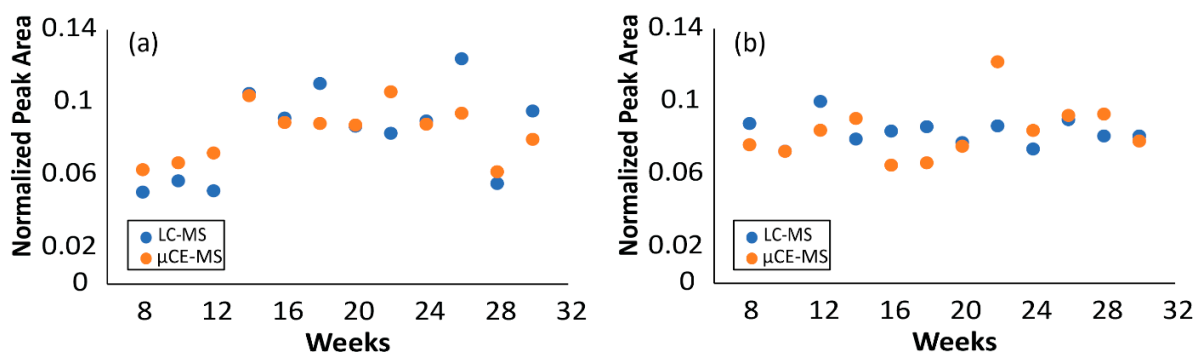

**Figure S3.** Comparison of time-resolved serum metabolomics data acquired with UHPLC-MS or  $\mu\text{CE}$ -HRMS platforms. Normalized peak abundance of (a) tryptophan and (b) ornithine in a TKO control mouse. The x-axis represents the age of mice in weeks. UHPLC-MS abundances are shown in blue and  $\mu\text{CE}$ -HRMS data in orange. For visualization purposes data were normalized to the sum of the peak areas for all time points.

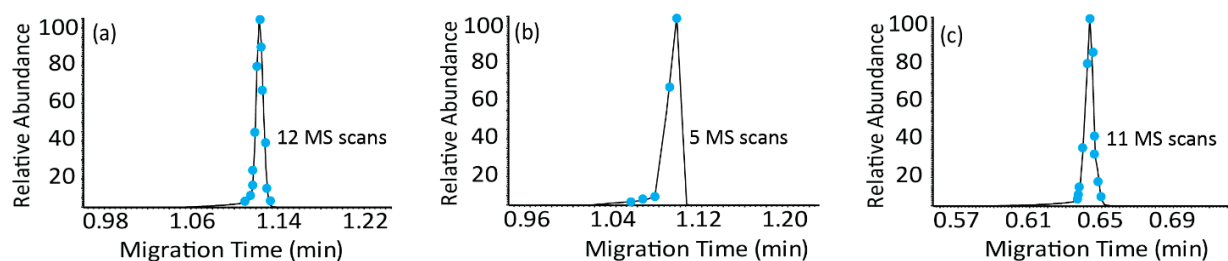

**Figure S4.** Comparison of  $\mu$ CE-HRMS peak shapes in different MS scan modes. Extracted ion electropherogram (XIE) of carnitine in (a) full scan mode (12 scans) , (b) parallel reaction monitoring (PRM) mode (5 scans) and (c) scheduled/multiplexed PRM mode (11 scans). MS scans per CE peak are shown as blue solid circles.

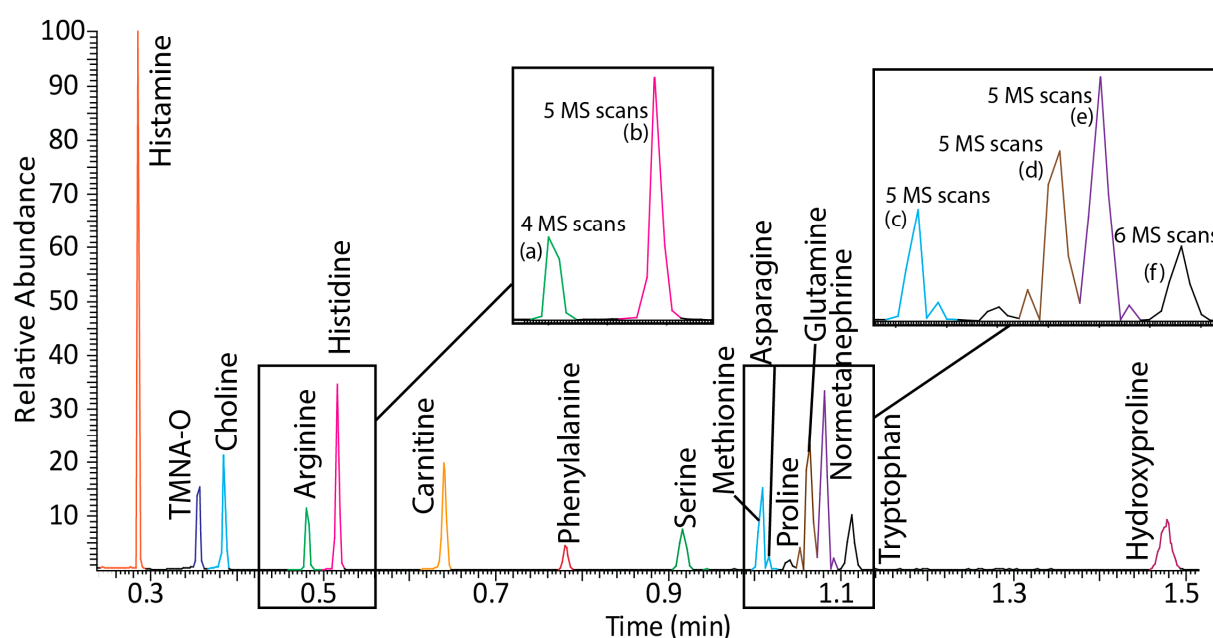

**Figure S5.**  $\mu$ CE-MS/MS separation of metabolites of interest. Extracted ion electropherogram (XIE) for a mixture of 15 metabolites in a scheduled/multiplexed PRM method. The x-axis represents the migration time in min and the y-axis the MS peak relative abundance. Individual MS scans acquired for (a) arginine (b) histidine (c) methionine (d) glutamine (e) normetanephrine and (f) tryptophan. Abbreviations : TMNA-O: trimethylamine-N-oxide.

**Table S1:** Metabolite standards and internal standards used for  $\mu$ CE-MS/MS analyses. Metabolite standards were purchased from Sigma Aldrich (Saint Louis, MO) and isotopically labeled internal standards were purchased from Cambridge Isotope Laboratories (Tewksbury, MA).

| Chemical standard; CAS number              | Internal standard used for data analysis; CAS number    |
|--------------------------------------------|---------------------------------------------------------|
| 5'-Hydroxy-L-tryptophan; 4350-09-8         | $^{13}\text{C}$ phenylalanine; 81201-86-7               |
| Acetylcholine chloride; 60-31-1            | $^{13}\text{C}$ phenylalanine; 81201-86-7               |
| L-Alanine; 56-41-7                         | $^{13}\text{C}$ methionine D <sub>3</sub> ; 263568-73-6 |
| 2-Aminoisobutyric acid; 62-57-7            | $^{13}\text{C}$ phenylalanine; 81201-86-7               |
| L-Arginine; 74-79-3                        | $^{13}\text{C}_6$ arginine; 201740-91-2                 |
| L-Asparagine; 70-47-3                      | $^{13}\text{C}_6$ arginine; 201740-91-2                 |
| Betaine; 107-43-7                          | $^{13}\text{C}$ phenylalanine; 81201-86-7               |
| L-Carnitine hydrochloride; 6645-46-1       | $^{13}\text{C}$ phenylalanine; 81201-86-7               |
| Choline chloride; 67-48-1                  | $^{13}\text{C}_6$ arginine; 201740-91-2                 |
| N, N-Dimethylglycine; 1118-68-9            | $^{13}\text{C}$ phenylalanine; 81201-86-7               |
| D-(+)-Glucosamine hydrochloride; 66-84-2   | $^{13}\text{C}$ phenylalanine; 81201-86-7               |
| L-Glutamine; 56-85-9                       | $^{13}\text{C}_6$ arginine; 201740-91-2                 |
| Glycine; 56-40-6                           | $^{13}\text{C}$ phenylalanine; 81201-86-7               |
| L-Histidine; 71-00-1                       | $^{13}\text{C}_6$ arginine; 201740-91-2                 |
| Trans-4-hydroxy-L-proline; 51-35-4         | $^{13}\text{C}$ phenylalanine; 81201-86-7               |
| L-Methionine; 63-68-3                      | $^{13}\text{C}$ methionine D <sub>3</sub> ; 263568-73-6 |
| DL-Normetanephine hydrochloride; 1011-74-1 | $^{13}\text{C}$ phenylalanine; 81201-86-7               |
| L-Phenylalanine; 63-91-2                   | $^{13}\text{C}$ phenylalanine; 81201-86-7               |
| L-Proline; 147-85-3                        | $^{13}\text{C}$ phenylalanine; 81201-86-7               |
| L-Serine; 56-45-1                          | $^{13}\text{C}_6$ arginine; 201740-91-2                 |
| Threonine; 72-19-5                         | $^{13}\text{C}$ methionine D <sub>3</sub> ; 263568-73-6 |
| Trimethylamine-N-oxide; 1184-78-7          | $^{13}\text{C}$ phenylalanine; 81201-86-7               |
| L-Tryptophan; 73-22-3                      | $^{13}\text{C}$ methionine D <sub>3</sub> ; 263568-73-6 |
| L-Tyrosine; 60-18-4                        | $^{13}\text{C}$ methionine D <sub>3</sub> ; 263568-73-6 |
| L-Valine; 72-18-4                          | $^{13}\text{C}$ methionine D <sub>3</sub> ; 263568-73-6 |
| Nicotinamide; 98-92-0                      | $^{13}\text{C}$ methionine D <sub>3</sub> ; 263568-73-6 |
| L-Aspartic acid; 56-84-8                   | $^{13}\text{C}_6$ arginine; 201740-91-2                 |
| Nicotinic acid; 59-67-6                    | $^{13}\text{C}$ phenylalanine; 81201-86-7               |
| $\gamma$ -Aminobutyric acid; 56-12-2       | $^{13}\text{C}$ phenylalanine; 81201-86-7               |
| DL-2-Aminoadipic acid; 542-32-5            | $^{13}\text{C}$ phenylalanine; 81201-86-7               |
| Cytidine; 65-46-3                          | $^{13}\text{C}_6$ arginine; 201740-91-2                 |
| L-Citrulline; 372-75-8                     | $^{13}\text{C}$ methionine D <sub>3</sub> ; 263568-73-6 |
| L-Kynurenine; 2922-83-0                    | $^{13}\text{C}$ phenylalanine; 81201-86-7               |
| L-Isoleucine; 73-32-5                      | $^{13}\text{C}$ phenylalanine; 81201-86-7               |
| L-Leucine; 61-90-5                         | $^{13}\text{C}$ methionine D <sub>3</sub> ; 263568-73-6 |
| L-Ornithine hydrochloride; 3184-13-2       | $^{13}\text{C}_6$ arginine; 201740-91-2                 |
| L-Lysine; 56-87-1                          | $^{13}\text{C}$ phenylalanine; 81201-86-7               |
| Glutamic acid; 56-86-0                     | $^{13}\text{C}$ methionine D <sub>3</sub> ; 263568-73-6 |
| Adenosine; 58-61-7                         | $^{13}\text{C}$ phenylalanine; 81201-86-7               |
| Adenine; 73-24-5                           | $^{13}\text{C}$ phenylalanine; 81201-86-7               |

**Table S2:** Multiplexed/scheduled  $\mu$ CE-MS/MS method. MS sampling frequency across  $\mu$ CE peaks and %RSD of peak areas in a scheduled/multiplexed parallel reaction monitoring (PRM) method for 12 metabolites are shown. Most relevant MS parameters: AGC target value 1E5 and maximum ion injection time of 20 ms. Spectral multiplexing (MSX) count of 6.

| Metabolite           | Peak Width (seconds) | Number of MS scans across peak | Peak Area %RSD without internal standard correction ( $n=4$ ) |
|----------------------|----------------------|--------------------------------|---------------------------------------------------------------|
| Arginine             | 1.2                  | 7                              | 11                                                            |
| Histidine            | 1.2                  | 7                              | 14                                                            |
| Carnitine            | 1.8                  | 10                             | 10                                                            |
| Normetanephrine      | 1.8                  | 12                             | 7                                                             |
| Serine               | 1.8                  | 12                             | 9                                                             |
| Methionine           | 1.8                  | 9                              | 7                                                             |
| Proline              | 1.8                  | 10                             | 11                                                            |
| Phenylalanine        | 1.8                  | 10                             | 12                                                            |
| Tryptophan           | 1.8                  | 10                             | 11                                                            |
| Glutamine            | 2.1                  | 10                             | 8                                                             |
| Trans-hydroxyproline | 3.0                  | 15                             | 8                                                             |

**Table S3.** Migration times and relative standard deviation (RSD) for peak areas of target analytes in TKO serum.

| Metabolite Name      | Migration time (min) | %RSD for peak area without internal standard correction (n=23) | %RSD for peak area of metabolite/ <sup>13</sup> C phenylalanine (n=23) | %RSD for peak area of metabolite / <sup>13</sup> C <sub>6</sub> arginine (n=23) | %RSD for peak area of / <sup>13</sup> C methionine D <sub>3</sub> |
|----------------------|----------------------|----------------------------------------------------------------|------------------------------------------------------------------------|---------------------------------------------------------------------------------|-------------------------------------------------------------------|
| Alanine              | 1.2                  | 17.24                                                          | 6.21                                                                   | 10.46                                                                           | 6.07                                                              |
| Aminoisobutyric acid | 1.3                  | 21.92                                                          | 4.91                                                                   | 10.93                                                                           | 5.55                                                              |
| arginine             | 1.0                  | 20.86                                                          | 12.18                                                                  | 2.85                                                                            | 12.25                                                             |
| asparagine           | 1.6                  | 25.92                                                          | 15.24                                                                  | 13.37                                                                           | 15.47                                                             |
| Betaine              | 1.9                  | 17.14                                                          | 6.75                                                                   | 10.42                                                                           | 7.67                                                              |
| Carnitine            | 1.2                  | 15.12                                                          | 11.45                                                                  | 12.62                                                                           | 12.67                                                             |
| Choline              | 0.9                  | 27.72                                                          | 23.28                                                                  | 19.39                                                                           | 23.55                                                             |
| Dimethylglycine      | 1.8                  | 18.22                                                          | 4.56                                                                   | 10.71                                                                           | 5.55                                                              |
| Glutamine            | 1.7                  | 20.47                                                          | 11.19                                                                  | 10.95                                                                           | 11.26                                                             |
| Glycine              | 1.2                  | 20.38                                                          | 8.25                                                                   | 10.44                                                                           | 8.79                                                              |
| Histidine            | 1.1                  | 22.35                                                          | 10.39                                                                  | 9.59                                                                            | 11.08                                                             |
| Trans-hydroxyproline | 2.0                  | 21.22                                                          | 8.50                                                                   | 8.64                                                                            | 8.73                                                              |
| Methionine           | 1.5                  | 20.61                                                          | 4.50                                                                   | 11.99                                                                           | 1.11                                                              |
| Phenylalanine        | 1.6                  | 20.65                                                          | 0.93                                                                   | 11.77                                                                           | 4.17                                                              |
| Proline              | 1.6                  | 17.94                                                          | 4.37                                                                   | 12.64                                                                           | 4.44                                                              |
| Serine               | 1.5                  | 27.30                                                          | 14.47                                                                  | 13.09                                                                           | 14.56                                                             |
| Threonine            | 1.5                  | 23.20                                                          | 8.99                                                                   | 9.93                                                                            | 8.34                                                              |
| Tryptophan           | 1.6                  | 24.01                                                          | 7.84                                                                   | 10.49                                                                           | 7.27                                                              |
| Tyrosine             | 1.8                  | 25.05                                                          | 10.75                                                                  | 11.65                                                                           | 10.09                                                             |
| Valine               | 1.4                  | 20.60                                                          | 4.77                                                                   | 10.41                                                                           | 4.66                                                              |
| Nicotinamide         | 1.5                  | 21.28                                                          | 5.33                                                                   | 10.10                                                                           | 4.48                                                              |
| Aspartic acid        | 1.8                  | 26.43                                                          | 14.03                                                                  | 12.96                                                                           | 14.57                                                             |
| Aminoadipic acid     | 1.7                  | 21.31                                                          | 8.27                                                                   | 11.11                                                                           | 8.42                                                              |
| Cytidine             | 1.5                  | 27.08                                                          | 15.16                                                                  | 14.47                                                                           | 15.21                                                             |
| Ornithine            | 1.0                  | 24.58                                                          | 14.82                                                                  | 12.45                                                                           | 14.33                                                             |
| Citrulline           | 1.7                  | 24.19                                                          | 11.20                                                                  | 12.21                                                                           | 11.13                                                             |
| Isoleucine           | 1.4                  | 23.18                                                          | 7.01                                                                   | 10.26                                                                           | 7.33                                                              |
| Leucine              | 1.4                  | 22.26                                                          | 6.87                                                                   | 9.74                                                                            | 6.21                                                              |

|                                           |     |       |       |       |       |
|-------------------------------------------|-----|-------|-------|-------|-------|
| Lysine                                    | 1.0 | 22.24 | 13.79 | 14.34 | 13.91 |
| Glutamic acid                             | 1.7 | 23.87 | 11.81 | 12.29 | 11.74 |
| <sup>13</sup> C phenylalanine             | 1.6 | 20.99 | --    | --    | --    |
| <sup>13</sup> C <sub>6</sub> arginine     | 1.0 | 19.83 | --    | --    | --    |
| <sup>13</sup> C methionine D <sub>3</sub> | 1.5 | 20.92 | --    | --    | --    |

**Table S4.** TKO mouse cohort information. The mouse ID, mouse age in weeks and corresponding %lifetime values are given for each mouse used in the analysis.

| Mouse ID | Phenotype | CE-MS sample ID | Age (weeks) | % Lifetime |
|----------|-----------|-----------------|-------------|------------|
| 8465     | TKO       | T13_1           | 8           | 33.0%      |
| 8465     | TKO       | T13_2           | 10          | 42.0%      |
| 8465     | TKO       | T13_3           | 12          | 50.0%      |
| 8465     | TKO       | T13_4           | 14          | 58.0%      |
| 8465     | TKO       | T13_5           | 16          | 67.0%      |
| 8465     | TKO       | T13_6           | 18          | 75.0%      |
| 8465     | TKO       | T13_7           | 20          | 83.0%      |
| 8465     | TKO       | T13_8           | 22          | 92.0%      |
| 8465     | TKO       | T13_9           | 24          | 100.0%     |
| 8256     | TKO       | T11_1           | 8           | 22.0%      |
| 8256     | TKO       | T11_2           | 10          | 28.0%      |
| 8256     | TKO       | T11_3           | 12          | 33.0%      |
| 8256     | TKO       | T11_4           | 14          | 39.0%      |
| 8256     | TKO       | T11_5           | 16          | 44.0%      |
| 8256     | TKO       | T11_6           | 18          | 50.0%      |
| 8256     | TKO       | T11_7           | 20          | 56.0%      |
| 8256     | TKO       | T11_8           | 22          | 61.0%      |
| 8256     | TKO       | T11_10          | 26          | 72.0%      |
| 8256     | TKO       | T11_11          | 28          | 78.0%      |
| 8256     | TKO       | T11_12          | 30          | 83.0%      |
| 8256     | TKO       | T11_13          | 32          | 89.0%      |
| 8256     | TKO       | T11_14          | 34          | 94.0%      |
| 8256     | TKO       | T11_15          | 36          | 100.0%     |
| 8472     | TKO       | T15_1           | 8           | 27.0%      |
| 8472     | TKO       | T15_3           | 12          | 40.0%      |
| 8472     | TKO       | T15_4           | 14          | 47.0%      |
| 8472     | TKO       | T15_5           | 16          | 53.0%      |
| 8472     | TKO       | T15_6           | 18          | 60.0%      |
| 8472     | TKO       | T15_7           | 20          | 67.0%      |
| 8472     | TKO       | T15_8           | 22          | 73.0%      |
| 8472     | TKO       | T15_9           | 24          | 80.0%      |
| 8472     | TKO       | T15_10          | 26          | 87.0%      |
| 8472     | TKO       | T15_11          | 28          | 93.0%      |
| 8103     | Control   | C8_1            | 8           | 24.0%      |
| 8103     | Control   | C8_2            | 10          | 29.0%      |
| 8103     | Control   | C8_3            | 12          | 35.0%      |
| 8103     | Control   | C8_4            | 14          | 41.0%      |
| 8103     | Control   | C8_5            | 16          | 47.0%      |
| 8103     | Control   | C8_6            | 18          | 53.0%      |



|      |         |        |    |        |
|------|---------|--------|----|--------|
| 8103 | Control | C8_7   | 20 | 59.0%  |
| 8103 | Control | C8_8   | 22 | 65.0%  |
| 8103 | Control | C8_9   | 24 | 71.0%  |
| 8103 | Control | C8_10  | 26 | 76.0%  |
| 8103 | Control | C8_11  | 28 | 82.0%  |
| 8103 | Control | C8_12  | 30 | 88.0%  |
| 8103 | Control | C8_13  | 32 | 94.0%  |
| 8103 | Control | C8_14  | 34 | 100.0% |
| 8284 | Control | C10_1  | 8  | 27.0%  |
| 8284 | Control | C10_2  | 10 | 33.0%  |
| 8284 | Control | C10_3  | 12 | 40.0%  |
| 8284 | Control | C10_4  | 14 | 47.0%  |
| 8284 | Control | C10_5  | 16 | 53.0%  |
| 8284 | Control | C10_6  | 18 | 60.0%  |
| 8284 | Control | C10_7  | 20 | 67.0%  |
| 8284 | Control | C10_8  | 22 | 73.0%  |
| 8284 | Control | C10_9  | 24 | 80.0%  |
| 8284 | Control | C10_10 | 26 | 87.0%  |
| 8284 | Control | C10_11 | 28 | 93.0%  |
| 8284 | Control | C10_12 | 30 | 100.0% |
| 8512 | Control | C13_1  | 8  | 25.0%  |
| 8512 | Control | C13_2  | 10 | 31.0%  |
| 8512 | Control | C13_3  | 12 | 38.0%  |
| 8512 | Control | C13_4  | 14 | 44.0%  |
| 8512 | Control | C13_5  | 16 | 50.0%  |
| 8512 | Control | C13_6  | 18 | 56.0%  |
| 8512 | Control | C13_7  | 20 | 63.0%  |
| 8512 | Control | C13_8  | 22 | 69.0%  |
| 8512 | Control | C13_9  | 24 | 75.0%  |
| 8512 | Control | C13_10 | 26 | 81.0%  |
| 8512 | Control | C13_11 | 28 | 88.0%  |
| 8512 | Control | C13_12 | 30 | 94.0%  |
| 8512 | Control | C13_13 | 32 | 100.0% |
